# Supplementary material for: Minocycline modulates microglia polarization in ischemia-reperfusion model of retinal degeneration and induces neuroprotection
Source: PubMed Central journal article supplement (PMC5656679; doi:10.1038/s41598-017-14450-5), 2017-10-25
Supplement: 41598_2017_14450_MOESM1_ESM.pdf [file 41598_2017_14450_MOESM1_ESM.pdf]

## **Minocycline modulates microglia polarization in ischemia-reperfusion model of retinal degeneration and induces neuroprotection**

Amel Ahmed<sup>1,3</sup>, Lei-Lei Wang<sup>1,2</sup>, Safaa Abdelmaksoud<sup>3</sup>, Amal Aboelgheit<sup>3</sup>, Safaa Saeed<sup>3</sup>, and Chun-Li Zhang<sup>1,2\*</sup>

<sup>1</sup>Department of Molecular Biology, University of Texas Southwestern Medical Center, Dallas, Texas 75390, USA

<sup>2</sup>Hamon Center for Regenerative Science and Medicine, University of Texas Southwestern Medical Center, Dallas, Texas 75390, USA

<sup>3</sup>Department of Histology and Cell Biology, Faculty of Medicine, Assiut University, Assiut, Egypt

\*Corresponding author

Chun-Li Zhang, Ph.D.

Tel: (214)-648-1670

Fax: (214)-648-1488

Email: [Chun-Li.Zhang@UTSouthwestern.edu](mailto:Chun-Li.Zhang@UTSouthwestern.edu)

### Supplementary Table S1. Primer sequences for qPCR

| Genes         | Sequences                                                                                     |
|---------------|-----------------------------------------------------------------------------------------------|
| <i>Cd11b</i>  | forward primer, 5'- AAGGATTCAGCAAGCCAGAA-3'<br>reverse primer, 5'-GGAGGGATGAGAG TCCACAT-3'    |
| <i>Cx3cr1</i> | forward primer, 5'-CAGCATCGACCGGTACCTT-3'<br>reverse primer, 5'-GCTGCACTGTCCGGTTGTT-3'        |
| <i>Iba1</i>   | forward primer, 5'-CTTGAA GCGAATGCTGGAGAA-3'<br>reverse primer, 5'-GGAGCCACTGGACACCTCTCT-3'   |
| <i>Il4</i>    | forward primer 5'-TGGGTCTCAACCCCCAGCTAGT-3'<br>reverse primer 5'-TGCATGGCGTCCCTTCTCCTGT-3'    |
| <i>Cd86</i>   | forward primer 5'-ACGATGGACCCCAGATGCACCA-3'<br>reverse primer 5'- GCGTCTCCACGGAAACAGCA-3'     |
| <i>Il1b</i>   | forward primer 5'-CCTGCAGCTGGAGAGTGTGGAT-3'<br>reverse primer 5'- TGTGCTCTGCTTGTGAGGTGCT-3'   |
| <i>Cd68</i>   | forward primer, 5'-CCACAGGCAGCACAGTGGACA-3'<br>reverse primer 5'-TCCACAGCAGAAGCTTTGGCCC-3'    |
| <i>Infg</i>   | forward primer, 5'- GCCAAGTTTGAGGTCAACAACCCA-3'<br>reverse primer 5'- CCCACCCCGAATCAGCAGCG-3' |
